# Supplementary material
Source: publisher figshare collection journal article supplement (https://acs.figshare.com/ndownloader/files/11491934)
Supplement: Supplementary file 1 [file 11491934]

## Supporting Information

### **Small molecule interferences in resazurin and mtt-based metabolic assays in the absence of cells**

Bella H. Neufeld<sup>a</sup>, Jesus B. Tapia<sup>a</sup>, Alec Lutzke<sup>a</sup>, and Melissa M. Reynolds<sup>\*abc</sup>

<sup>a</sup>Department of Chemistry, <sup>b</sup>School of Biomedical Engineering, and <sup>c</sup>Department of Chemical and Biological Engineering, Colorado State University, Fort Collins, CO 80523, USA.

E-mail addresses:

Corresponding author: [melissa.reynolds@colostate.edu](mailto:melissa.reynolds@colostate.edu)

Co-authors: [bellfeld@rams.colostate.edu](mailto:bellfeld@rams.colostate.edu), [Jesus.Tapia@colostate.edu](mailto:Jesus.Tapia@colostate.edu), [Alec.Lutzke@colostate.edu](mailto:Alec.Lutzke@colostate.edu).

## **Table of Contents**

**Table S-1.** Table containing complete list of species tested for interferences against resazurin and MTT assays at six concentrations.

**Figure S-1.** UV-Vis spectra of four interfering species in the presence of resazurin taken every hour.

**Figure S-2.** MS data for four interfering species related to resazurin assay.

**Figure S-3.** UV-Vis spectra of five interfering species in the presence of MTT taken every hour.

**Figure S-4.** MS data for five interfering species related to MTT assay.

**Table S-1.** Results from resazurin (R) and MTT (M) assays in the presence of the 19 species listed at six tested concentrations. The value displayed is the either the largest average deviation that occurred at some point during the four-hour reaction period or a statistically significant difference was not present when compared to the controls, as denoted by “ns” (n ≥ 3). Functional groups on each species are also displayed (T=thiol, An=amine, Ad=amide, A=acid, D=disulphide, Oh=alcohol).

|        |                           | R         | M          | R           | M    | R     | M      | R   | M    | R   | M    | R   | M    |
|--------|---------------------------|-----------|------------|-------------|------|-------|--------|-----|------|-----|------|-----|------|
| Sample | Functional Groups Present | 1 $\mu$ M | 10 $\mu$ M | 100 $\mu$ M | 1 mM | 10 mM | 100 mM |     |      |     |      |     |      |
| 1      | T, An, Am, A              | ns        | -19        | ns          | 23   | ns    | 113    | ns  | 2336 | -50 | 2378 | -91 | 234  |
| 2      | An, Ad, D, A              | ns        | 23         | ns          | 25   | ns    | 30     | ns  | 37   | -69 | -16  | -71 | -16  |
| 3      | T, An, A                  | ns        | -22        | ns          | 18   | ns    | 20     | ns  | 170  | 23  | 3670 | 51  | 1897 |
| 4      | T, ad, ac                 | ns        | -26        | ns          | 16   | ns    | 34     | ns  | 130  | ns  | 273  | -83 | 221  |
| 5      | T, a                      | ns        | -26        | ns          | -25  | ns    | 117    | ns  | 585  | -90 | 609  | -97 | 296  |
| 6      | T, ad, a                  | ns        | -28        | ns          | -23  | ns    | 45     | ns  | 1113 | ns  | 894  | -95 | 130  |
| 7      | An, d                     | ns        | -28        | ns          | -27  | ns    | -25    | ns  | -22  | ns  | ns   | ns  | 52   |
| 8      | T, an, a                  | ns        | -24        | ns          | -20  | ns    | 108    | 13  | 861  | 59  | 3010 | -47 | 1878 |
| 9      | T, an, a                  | ns        | ns         | ns          | ns   | ns    | 94     | ns  | 1699 | ns  | 3558 | 161 | 3049 |
| 10     | An                        | ns        | ns         | ns          | -18  | ns    | -13    | ns  | 20   | 25  | 57   | ns  | 132  |
| 11     | An                        | ns        | ns         | ns          | ns   | ns    | 14     | 7   | ns   | 9   | 20   | ns  | 43   |
| 12     | An                        | ns        | ns         | ns          | 14   | ns    | 13     | 9   | 11   | ns  | 13   | ns  | 14   |
| 13     | D                         | ns        | 13         | ns          | 12   | ns    | 14     | ns  | 13   | ns  | 13   | ns  | 13   |
| 14     | T                         | ns        | ns         | ns          | ns   | ns    | ns     | 6   | ns   | ns  | 27   | ns  | 247  |
| 15     | T                         | ns        | 19         | ns          | 18   | ns    | 15     | ns  | 12   | ns  | 17   | ns  | 28   |
| 16     | -                         | -11       | ns         | ns          | 9    | -24   | 9      | -23 | ns   | -24 | 12   | ns  | 39   |
| 17     | A, oh                     | ns        | ns         | ns          | 41   | ns    | 249    | 45  | 3718 | -83 | 4535 | -96 | 1984 |
| 18     | Oh                        | ns        | ns         | ns          | ns   | 8     | ns     | 11  | ns   | ns  | 15   | ns  | 103  |
| 19     | T, oh                     | ns        | ns         | ns          | ns   | ns    | 119    | ns  | 2045 | ns  | 4487 | 47  | 1838 |

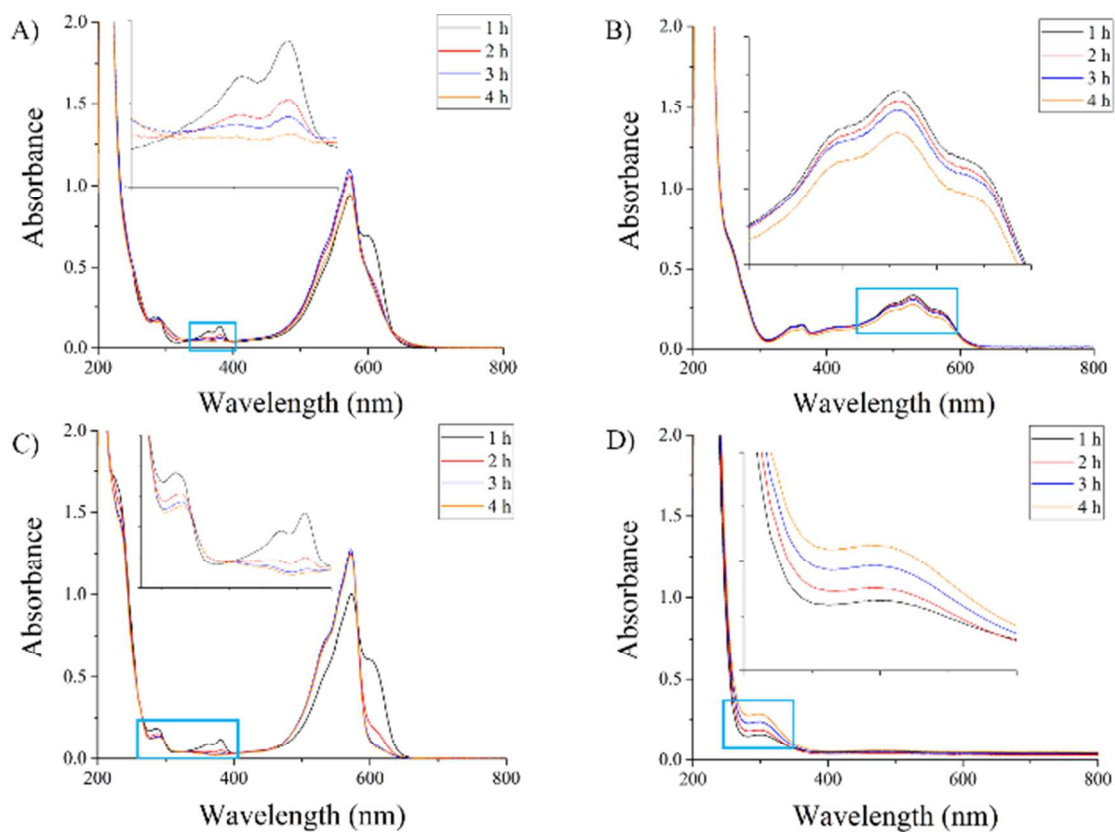

**Figure S-1.** UV-Vis spectra obtained for the four representative interfering species at 10 mM (A – glutathione (1); B – oxidized glutathione (2); C – D-Penicillamine (8); D – mercaptosuccinic acid (5)) in the presence of resazurin assay after each hour of incubation. Inset in each spectra shows zoomed in regions of initial spectra obtained from 200-800 nm.

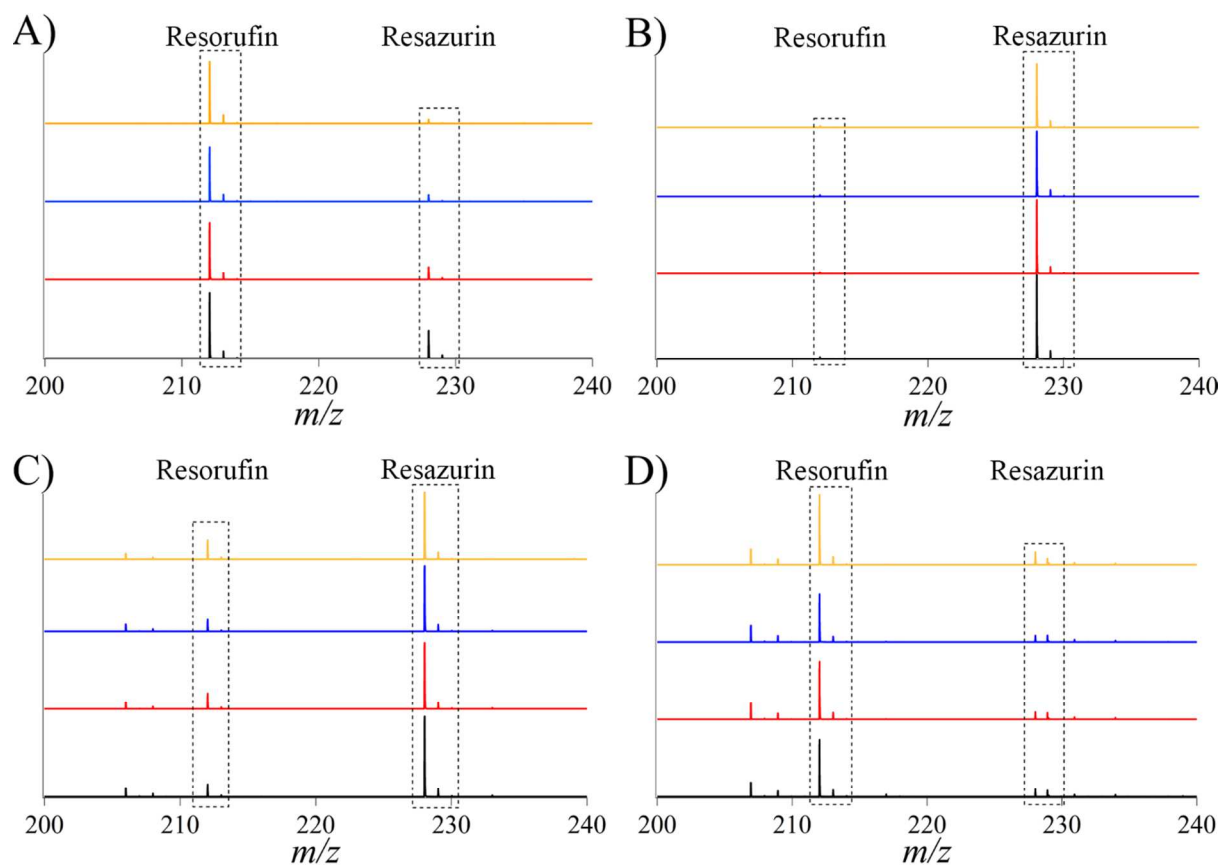

**Figure S-2.** Mass spectra obtained for the four representative interfering species at 10 mM (A – glutathione (1); B – oxidized glutathione (2); C – D-Penicillamine (8); D – mercaptosuccinic acid (5)) in the presence of resazurin assay after each hour of incubation. Plots are shown with increasing time on y-axis (hour 1 is black line – hour 4 is yellow line).

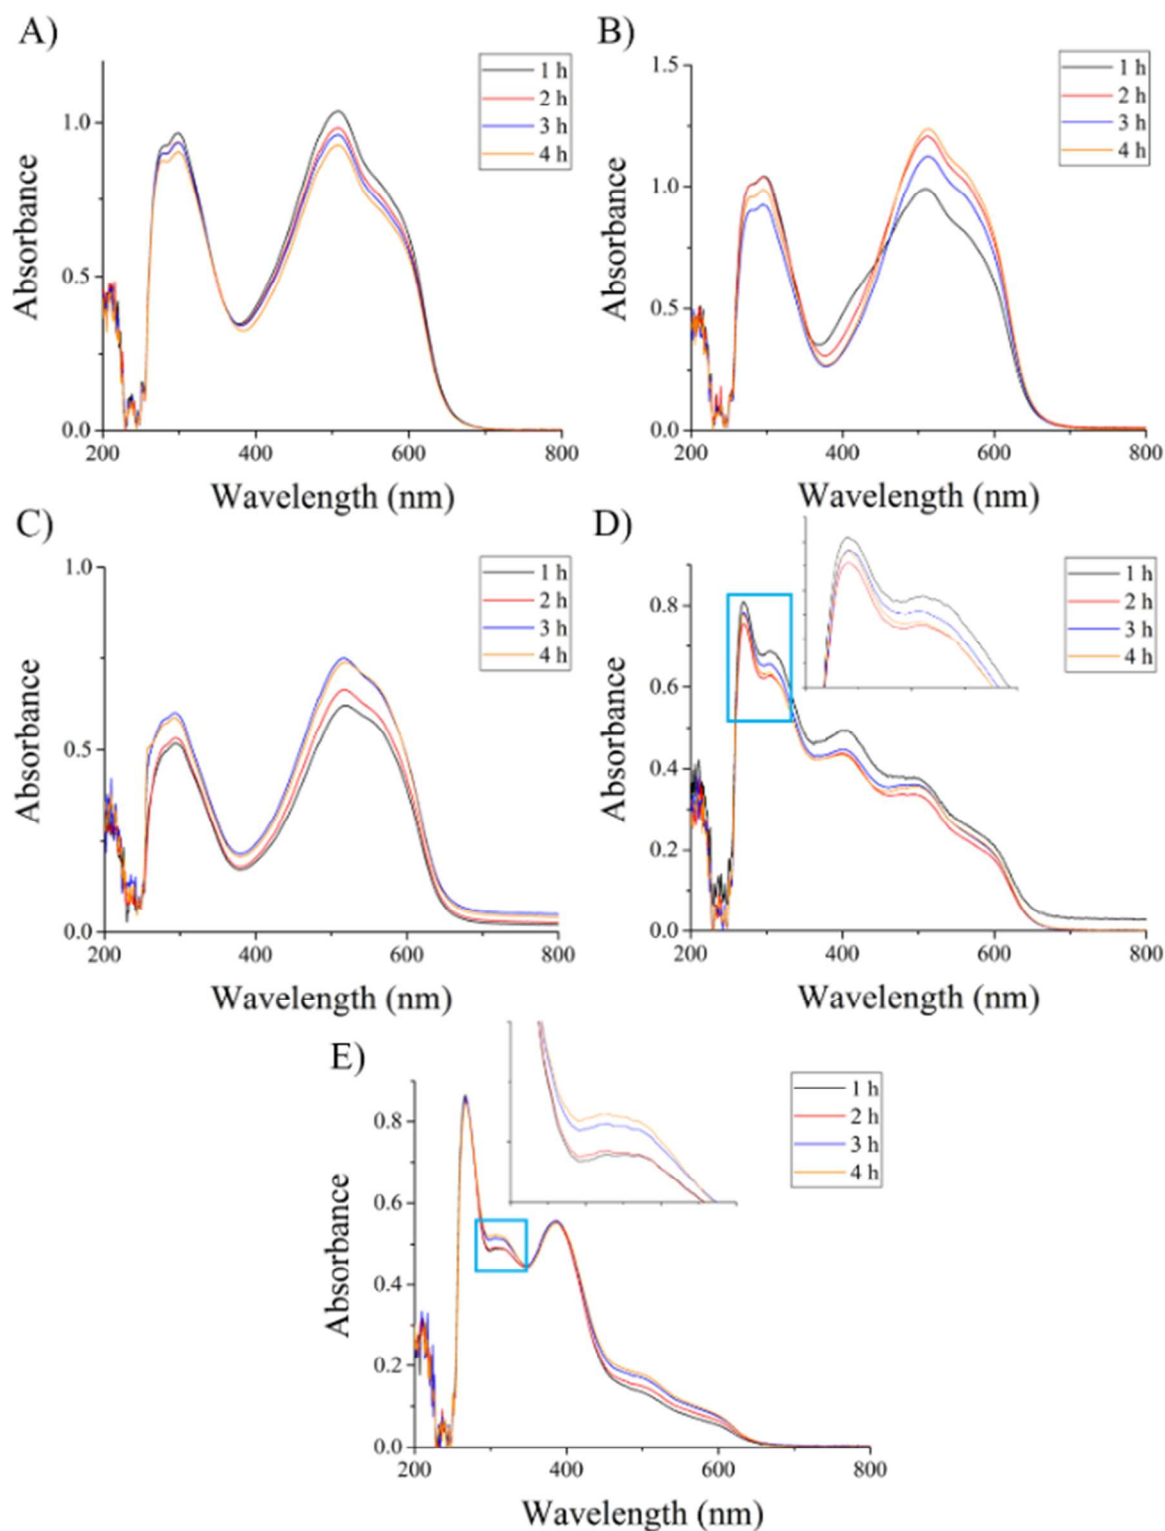

**Figure S-3.** UV-Vis spectra obtained for the five representative interfering species at 10 mM (A – glutathione (1); B – D-Penicillamine (8); C – L-Cysteine (3); D – mercaptosuccinic acid (5); E – N-Acetyl-D-penicillamine (4)) in the presence of MTT assay after each hour of incubation. Inset in each spectra shows zoomed in regions of initial spectra obtained from 200-800 nm.

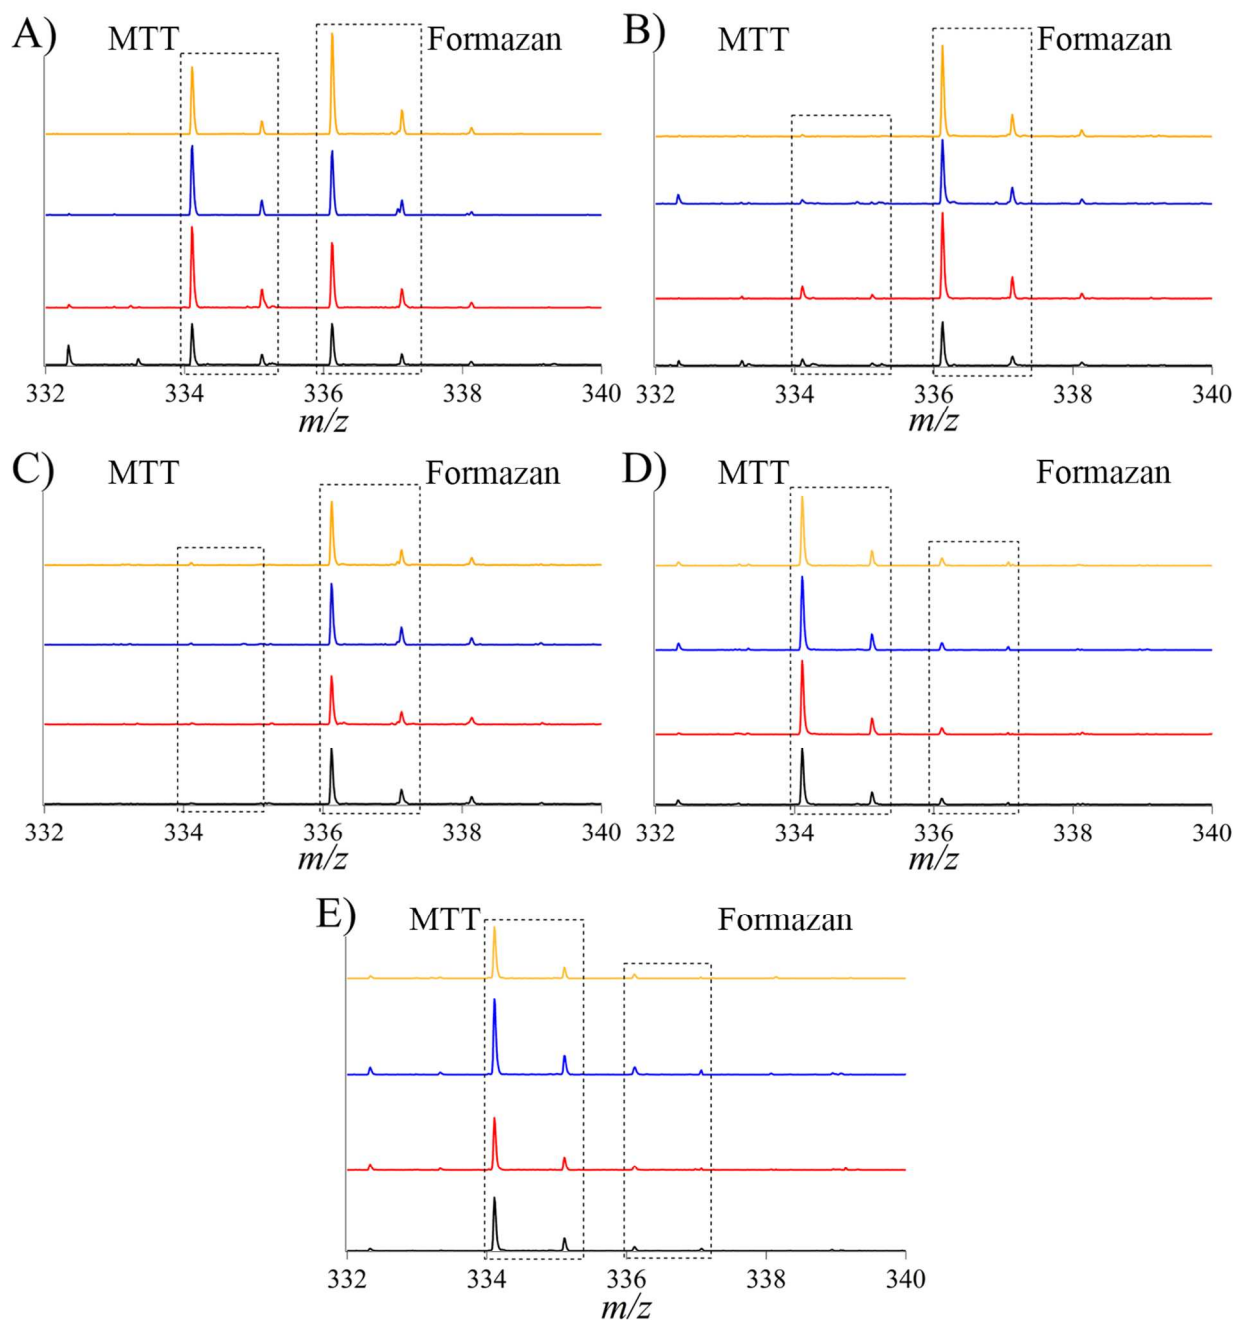

**Figure S-4.** Mass spectra obtained for the five representative interfering species at 10 mM (A – glutathione (**1**); B – D-Penicillamine (**8**); C – L-Cysteine (**3**); D – mercaptosuccinic acid (**5**); E – *N*-Acetyl-D-penicillamine (**4**) in the presence of MTT assay after each hour of incubation. Plots are shown with increasing time on y-axis (hour 1 is black line – hour 4 is yellow line).
